# Supplementary material for: Nutritional Support with Omega-3 Fatty Acids in Burn Patients: A Systematic Review with Meta-Analysis of Randomized Controlled Trials
Source: MDPI journal article supplement (doi:10.3390/nu14142874), 2022-07-13
Supplement: s1 [file s1]

|                          | Random sequence generation (selection bias) | Allocation concealment (selection bias) | Blinding of participants and personnel (performance bias) | Blinding of outcome assessment (detection bias) | Incomplete outcome data (attrition bias) | Selective reporting (reporting bias) | Other bias |
|--------------------------|---------------------------------------------|-----------------------------------------|-----------------------------------------------------------|-------------------------------------------------|------------------------------------------|--------------------------------------|------------|
| <b>Bernier 1998</b>      |                                             | -                                       | +                                                         | -                                               | +                                        | +                                    | +          |
| <b>Chuntrasakul 2003</b> |                                             | -                                       | -                                                         | -                                               | +                                        | +                                    | +          |
| <b>Garrel 1995</b>       | +                                           |                                         | +                                                         | -                                               | -                                        | +                                    | +          |
| <b>Gottschlich 1990</b>  | +                                           |                                         | +                                                         | -                                               | +                                        | +                                    |            |
| <b>Saffie 1997</b>       | -                                           | -                                       | +                                                         | -                                               | +                                        | +                                    | +          |
| <b>Tihista 2018</b>      | +                                           |                                         | +                                                         | -                                               | -                                        | +                                    |            |
| <b>Wibbenmeyer 2006</b>  | +                                           |                                         | +                                                         | -                                               | -                                        | +                                    |            |

+ Low risk of bias

- High risk of bias

Supplemental Figure S1. Risk of bias assessment
